# Supplementary material for: Effective Matrix Designs for COVID-19 Group Testing
Source: bioRxiv or medRxiv preprint supplement (doi:10.1101/2022.08.23.22279137), 2023-01-11
Supplement: Supplementary file [file media-1.pdf]

## PROOF OF LEMMA 1

DAVID BRUST AND JOHANNES J. BRUST

PROOF OF LEMMA 1 ( $d = 2$ , AND  $q = p$  (PRIME))

Designs with  $d = 2$  and  $q = p$  (prime order), use modulus arithmetic and lines and may therefore be regarded to be simpler than more general polynomial constructions. Thus we provide a proof of Lemma 1 in this situation in order to motivate the underlying computations.

Similar like in the main text, suppose that  $1 \leq k < p$  and let  $j \neq i$ . Select an arbitrary pair of samples  $\{(x_i, y_{x_i}); (x_j, y_{x_j})\}$ , computed using, say,  $a$  and  $b$ . Consider the different slope  $\bar{a} \neq a$  and intercept  $\underline{b} \neq b$ . There are four possibilities to generate pools in PP, and consequently pairs of samples other than a base pair

|                                    |                                                                                                |
|------------------------------------|------------------------------------------------------------------------------------------------|
| Base: Slope and intercept given    | $a, b$ with $\{(x_i, y_{x_i}); (x_j, y_{x_j})\}$                                               |
| Case 1: Slope differs              | $\bar{a}, b$ with $\{(x_i, \bar{y}_{x_i}); (x_j, \bar{y}_{x_j})\}$                             |
| Case 2: Intercept differs          | $a, \underline{b}$ with $\{(x_i, \underline{y}_{x_i}); (x_j, \underline{y}_{x_j})\}$           |
| Case 3: Slope and intercept differ | $\bar{a}, \underline{b}$ with $\{(x_i, \bar{\underline{y}}_i); (x_j, \bar{\underline{y}}_j)\}$ |
| Case 4: Slope at infinity          | $\bar{a} = q$ with $\{(x_i^\infty, y_i^\infty); (x_j^\infty, y_j^\infty)\}$                    |

Next we analyze how the pairs in each of the four cases compare to the base pair  $\{(x_i, y_{x_i}); (x_j, y_{x_j})\}$ . We use  $y^+ \in \{\bar{y}, \underline{y}, \bar{\underline{y}}\}$  to represent a  $y$  value from one of the Cases 1-3. Note that the conditions for having different pairs of samples in these cases are

$$(1) \quad \text{if } y_{x_i} = y_{x_i}^+ \text{ then } y_{x_j} \neq y_{x_j}^+, \quad \text{or} \quad \text{if } y_{x_j} = y_{x_j}^+ \text{ then } y_{x_i} \neq y_{x_i}^+$$

For  $d = 2$  the lines  $y = (ax+b) \bmod p$  generate the different pools, which we use to evaluate condition (1). Moreover, with  $d = 2$ , the indices simplify to  $i_{d-1} = i_1 = i$  and  $x_i = i, x_j = j$ .

*Proof.* Case 1: Only the slope  $\bar{a}$  differs and we use the notation  $y^+ = \bar{y}$ . From the equation of a line and from (1)

$$y_{x_k} - \bar{y}_{x_k} = 0 \quad \text{implies} \quad ((a - \bar{a})x_k) \bmod p = 0 \quad \text{and} \quad x_k = 0, \quad k \in \{i, j\}$$

Since  $x_k = k \neq x_t = t$  for  $t \neq k \in \{i, j\}$  we see that

$$\text{if } y_{x_k} = \bar{y}_{x_k} \text{ then } x_k = 0, x_t > 0, \quad y_{x_t} - \bar{y}_{x_t} = ((a - \bar{a})x_t) \bmod p \neq 0 \quad t \neq k \in \{i, j\}$$

Therefore, we conclude that  $y_{x_j} \neq \bar{y}_{x_j}$  when  $y_{x_i} = \bar{y}_{x_i}$  and similarly for the reverse  $y_{x_i} \neq \bar{y}_{x_i}$  when  $y_{x_j} = \bar{y}_{x_j}$ . This means that pairs of samples do not co-occur when pools are generated in case 1.

Case 2: Only the intercept  $\underline{b}$  differs and  $y^+ = \underline{y}$ . Note that

$$y_{x_k} - \underline{y}_{x_k} = (b - \underline{b}) \bmod p \neq 0, \quad k \in \{i, j\}$$

Therefore  $y_{x_i} \neq \underline{y}_{x_i}$  and  $y_{x_j} \neq \underline{y}_{x_j}$  and all samples and corresponding pairs are different in this case.

Case 3: Both slope  $\bar{a}$  and intercept  $\underline{b}$  differ and we denote  $y^+ = \bar{y}$ . Using condition (1) one finds that

$$y_{x_k} - \bar{y}_{x_k} = 0 \quad \text{implies} \quad ((a - \bar{a})x_k + (b - \underline{b})) \bmod p = 0, \quad k \in \{i, j\}$$

which means that

$$y_{x_k} - \bar{y}_{x_k} = 0 \quad \text{implies} \quad ((a - \bar{a})x_k) \bmod p = -(b - \underline{b}) \bmod p, \quad k \in \{i, j\}$$

Therefore, for  $k = x_k \neq x_t = t$  when  $t \neq k \in \{i, j\}$  it holds that

$$\begin{aligned} \text{if } y_{x_k} = \bar{y}_{x_k} \text{ then } y_{x_t} - \bar{y}_{x_t} &= ((a - \bar{a})x_t + (b - \underline{b})) \bmod p \\ &= ((a - \bar{a})x_t - (a - \bar{a})x_k) \bmod p \\ &= ((a - \bar{a})(x_t - x_k)) \bmod p \\ &\neq 0, \quad k \in \{i, j\} \end{aligned}$$

The final equality holds because  $a \neq \bar{a}$  and  $x_t \neq x_k$ ,  $t \neq k \in \{i, j\}$  by definition.

Case 4: With slope of ‘‘infinity’’  $\in \mathbb{F}_p$  a pool of samples is computed with a special formula. Specifically, a pool (with  $d = 2$ ) with this slope is defined to have  $x_i^\infty = \sum_{l=2}^{2-1} p^{d-1-l} i_l + q^{2-2} b = b = x_j^\infty = b$  and

$$\{(x_i^\infty, y_i^\infty); (x_j^\infty, y_j^\infty)\} = \{(b, y_i^\infty); (b, y_j^\infty)\}.$$

Since  $x_k \neq x_t$  for  $k \neq t \in \{i, j\}$  (by definition) we note that if  $x_k = b = x_k^\infty$  and  $y_{x_k} = y_k^\infty$  then  $x_t \neq x_t^\infty = x_k = b$ . Thus no pairs occur more than once with the pools from slopes  $a < q$  and  $a = q$ . Therefore, we conclude from the four cases that pairs occur jointly  $d - 1 = 1$  times for all slopes  $a \leq p$ .  $\square$
